# Supplementary material
Source: Springer Nature journal article supplement (https://www.springermedizin.de/resource/supplementary/12889_2007_1137_MOESM2_ESM.pdf/9502532)
Supplement: MOESM2 [file 9502532]

**Promotion of antihypertensives for particular subgroups of patients  
(in main body of advertisement)**

| <b>Subgroup of patients</b>                                                           | <b>Number of advertisements (% of total)</b> |
|---------------------------------------------------------------------------------------|----------------------------------------------|
| Isolated systolic hypertension                                                        | 20 (17.7%)                                   |
| Patients uncontrolled on monotherapy                                                  | 12 (10.6%)                                   |
| Diabetes plus hypertension                                                            | 11 (9.7%)                                    |
| Diabetes                                                                              | 5 (4.4%)                                     |
| Secondary prevention of coronary artery disease                                       | 4 (3.5%)                                     |
| Hypertension plus coronary artery disease                                             | 4 (3.5%)                                     |
| Secondary prevention of cerebrovascular disease                                       | 3 (2.7%)                                     |
| Hypertension plus cerebrovascular disease                                             | 3 (2.7%)                                     |
| Diabetes plus one additional cardiovascular risk factor (as per HOPE study* criteria) | 1 (0.9%)                                     |
| Prevention of progression of renal failure in patients with proteinuria               | 0 (0%)                                       |
| Other <sup>†</sup>                                                                    | 9 (8.0%)                                     |

\* The Heart Outcomes Prevention Evaluation Investigators. Effects of an angiotensin-converting-enzyme inhibitor, ramipril, on cardiovascular events in high-risk patients. *N Engl J Med.* 2000; 342: 145–153.

<sup>†</sup> included asthma, renal impairment, heart failure, elderly patients and intermittently non-compliant patients.
